# Supplementary material for: Development of a point-of-care-device for fast detection of periodontal pathogens
Source: BMC Oral Health. 2015 Dec 24;15:165. doi: 10.1186/s12903-015-0155-y (PMC4690268; doi:10.1186/s12903-015-0155-y)
Supplement: Additional file 2: Table S2. — Primer sequences and product size. (XLSX 12 kb) [file 12903_2015_155_MOESM2_ESM.xlsx]

## Sheet: Tabelle1
Table S2 Primer sequences and product size
Designation	Sequence 5'-3'	Length (bp)	Product (bp)
16S-fwa	AGAGTTTGATCMTGGCTCAIIIIIAACGCT	30	Approx. 500
16S-rva	CGCGGCTGCTGGCAIIIAITTRGC	24
A. actinomycetemcomitans-fw	TGCATTTCATACTGGGGG	18	222
A. actinomycetemcomitans-rv	GCACCAGGGCTAAACC	16
E. corrodens-fw	AAGACCTCGCGTTATTCG	18	444
E. corrodens-rv	TAGCTATCCAGTTCAGAAC	24
P. gingivalis-fw	CGGCGCACGGGTGCGTAAC	19	580
P. gingivalis-rv	ACCACGAATTCCGCCTGCCG	20
P. intermedia-fw	TCCAACCTTCCCTCCACTCGGG	22	719
P. intermedia-rv	CGCCAGGCGCTAACAGCGG	19
T. denticola-fw	CAACGATGGGTATCCGGCCTGAG	23	398
T. denticola-rv	CGGTTTCCCCTCCGTGATTCAAGTC	25
C. rectus-fw	ATCGTATCAGCTAGTTGGTAGGG	23	245
C. rectus-rv	CCGGTGCTTATTCCTTGGGTACC	23
P. micra-fw	ATACCGCATGAGACCACAGAATCGC	25	973
P. micra-rv	TTTGTCATCGGCAGTCTCTCCAGA	24
E. nodatum-fw	CGGCTTACCAAGGCGACGATCAG	23	714
E. nodatum-rv	TCAGTGGGATGTCAAGTCCTGGTAAGG	27
C. gingivalis-fw	TGAGACAGGGACCAGACTCCTACG	24	521
C. gingivalis-rv	CTCAGCTTGCGCCAAACAGCTA	22
F. periodonticum-fw	GAGAGAGCTTTGCGTCCCATTAGC	22	343
F. periodonticum-rv	CCACCTAGACGCGCTTTACGCCC	25
S. aureus-fw	GCGATTGATGGTGATACKGTTAAAIIIIIGTACAAAGG	38	279
S. aureus-rv	AGCCAAGCCTTGACGAACTAAIIIIICGTTTACC	34
aBold letter = locked nucleic acid. M = A or C; R = A or G; I = deoxyinosine.
